# Supplementary material for: Thoracic Surgery during Pregnancy and Breastfeeding – an Interdisciplinary Consensus Paper
Source: PubMed Central journal article supplement — Zentralbl Chir. 2023 May 15;149(1):128–32. [Article in German] doi: 10.1055/a-2074-7405 (PMC10914491; doi:10.1055/a-2074-7405), 2023-05-15
Supplement: 10-1055-a-2074-7405_20777328.pdf [file 10-1055-a-2074-7405_20777328.pdf]

## Anhang 1: Checkliste OpidS in der Thoraxchirurgie

|                                                                    | Wer?                                                  | Wann?                                                 | Besonderheiten                                                   |                          |
|--------------------------------------------------------------------|-------------------------------------------------------|-------------------------------------------------------|------------------------------------------------------------------|--------------------------|
| Meldung Schwangerschaft an Arbeitgeber:in                          | Schwangere an Arbeitgeber:in                          | So früh wie möglich                                   | Mitteilung gewünschter Tätigkeiten                               | <input type="checkbox"/> |
| Meldung Schwangerschaft an entsprechende Behörde (Landesdirektion) | Arbeitgeber:in an Arbeitsschutzbehörde                | unverzüglich                                          |                                                                  | <input type="checkbox"/> |
| Gefährdungsbeurteilung                                             | Arbeitgeber:in, unterstützt durch Arbeitsmediziner:in | unverzüglich                                          |                                                                  | <input type="checkbox"/> |
| Impfschutz und (HBV) Immunstatus kontrollieren (ToRCH-Erreger)     | Schwangere, durch Arbeitsmedizin und Gynäkologie      | So früh wie möglich, idealerweise vor Schwangerschaft | (Antikörper von Röteln, HIV, VZV, CMV, ParvoB19)                 | <input type="checkbox"/> |
| Organisation Patient:innen-Screening                               | Arbeitgeber:in und Schwangere gemeinsam               | vor jeder OP                                          | HIV-Test bedarf schriftlicher Zustimmung, Kostenübernahme klären | <input type="checkbox"/> |
| Vereinbarung über Narkoseführung treffen                           | Schwangere mit Anästhesie                             | vor erster OP                                         |                                                                  | <input type="checkbox"/> |
| Umgestaltung OP-Umfeld                                             |                                                       |                                                       |                                                                  | <input type="checkbox"/> |
| Delegation Lagerung                                                |                                                       |                                                       |                                                                  | <input type="checkbox"/> |
| Personeller Back-Up                                                |                                                       |                                                       |                                                                  | <input type="checkbox"/> |
| Sitzgelegenheit verfügbar                                          |                                                       |                                                       |                                                                  | <input type="checkbox"/> |
| Indikatorhandschuhe, Schutzbrille, ggf. Visier                     |                                                       |                                                       |                                                                  | <input type="checkbox"/> |
| OP-Dauer < 4 Stunden                                               |                                                       |                                                       |                                                                  | <input type="checkbox"/> |
